# Supplementary material
Source: ML conference proceedings conference paper supplement (https://openaccess.thecvf.com/content/ICCV2023/html/Liu_Low-Light_Image_Enhancement_ICCV_2023_paper.html)
Supplement: Supplementary file 1 [file Liu_Low-Light_Image_Enhancement_ICCV_2023_supplemental.pdf]

# Supplementary Material for “Low-Light Image Enhancement with Multi-stage Residue Quantization and Brightness-aware Attention”

Yunlong Liu<sup>1,\*</sup> Tao Huang<sup>1,\*</sup> Weisheng Dong<sup>1,†</sup> Fangfang Wu<sup>1</sup> Xin Li<sup>2</sup> Guangming Shi<sup>1</sup>  
<sup>1</sup> Xidian University <sup>2</sup> University at Albany

liuyunlong@stu.xidian.edu.cn thuang\_666@stu.xidian.edu.cn wsdong@mail.xidian.edu.cn  
wufangfang@xidian.edu.cn xli48@albany.edu gmshi\_xidian@163.com

In this Supplementary Material, we provide details of the spectral attention block (SAB) [1, 2]. In addition, more visual comparison results for different scenes are provided.

## 1. Spectral attention block

As shown in Figure 1 (a), the spectral attention block (SAB) consists of two cascaded residual modules. Specifically, the two residual modules contain a layer norm layer, a short-cut connection, and a spectral-wise multi-head self-attention (S-MSA) or FFN layer, respectively. The FFN layer consists of three linear projections.

**Spectral-wise Multi-head Self-Attention** Figure 1 (b) demonstrates the S-MSA calculation process with a single head, some details are omitted for brevity.

Given the embedded feature  $\mathbf{X}_{in} \in \mathbb{R}^{H \times W \times C}$  as input,  $\mathbf{X}_{in}$  is first spatially flattened to tokens  $\mathbf{X} \in \mathbb{R}^{HW \times C}$ . Then  $\mathbf{X}$  is linearly mapped to the query  $\mathbf{Q} \in \mathbb{R}^{HW \times C}$ , the key  $\mathbf{K} \in \mathbb{R}^{HW \times C}$ , and the value  $\mathbf{V} \in \mathbb{R}^{HW \times C}$  as follows:

$$\mathbf{Q} = \mathbf{X}\mathbf{W}^Q, \mathbf{K} = \mathbf{X}\mathbf{W}^K, \mathbf{V} = \mathbf{X}\mathbf{W}^V, \quad (1)$$

where  $\mathbf{W}^Q, \mathbf{W}^K, \mathbf{W}^V \in \mathbb{R}^{C \times C}$  are trainable parameters. Following that,  $\mathbf{Q}, \mathbf{K}$  and  $\mathbf{V}$  are split into  $N$  heads along the spectral dimension, respectively:

$$\begin{aligned} [\mathbf{Q}_1, \mathbf{Q}_2, \dots, \mathbf{Q}_N] &= \mathbf{Q}, \\ [\mathbf{K}_1, \mathbf{K}_2, \dots, \mathbf{K}_N] &= \mathbf{K}, \\ [\mathbf{V}_1, \mathbf{V}_2, \dots, \mathbf{V}_N] &= \mathbf{V}. \end{aligned} \quad (2)$$

S-MSA treats each channel as a token and computes self-attention for head  $j$  as follows:

$$\mathbf{A}_j = \text{Softmax}(\sigma_j \mathbf{K}_j^T \mathbf{V}_j), \quad (3)$$

$$\text{head}_j = \mathbf{V}_j \mathbf{A}_j, \quad (4)$$

where  $\sigma_j \in \mathbb{R}^1$  is a trainable parameter to adapt self-attention  $\mathbf{A}_j$ . After that, all outputs of  $N$  heads are concatenated and fed into a linear projection layer and a position embedding (PE) layer as

$$\text{S-MSA}(\mathbf{X}) = \text{Concat}_{j=1}^N(\text{head}_j) \cdot \mathbf{W} + \text{PE}(\mathbf{X}) \quad (5)$$

where  $\mathbf{W}$  is a trainable matrix and  $\text{PE}(\cdot)$  denotes a stack of two convolution layers.

## 2. More visual comparison results

Note that the input images shown in Figures 1, 2, and 5-8 of the main text are actually grayscale versions of the low-light images. At first, we provide the color version of the low-light inputs as shown in Figures ??-??. Furthermore, we provide more visual comparison results of different scenes on the LOLv1 [3], LOLv2-Real [5], and LOLv2-Synthetic [5] dataset, as shown in Figures 2-4 for further demonstration of the superiority of our proposed methods.

MIR-Net [6] tends to produce noise and blurred artifacts, as shown in Figure 2 and 3 and a different color tone from the ground truth in Figure 4. DCC-Net [7] shows color inconsistency and blurred artifacts as shown in Figure 2 (middle) and (bottom), respectively. SNR [4] produces blurred artifacts when faced with complex details, as shown in Figure 2 and 3, and the color tends to be different from the ground truth as shown in Figure 3 and 4. Compared to the above methods, our proposed method reconstructs higher visual quality with better color tone and more image details and textures.

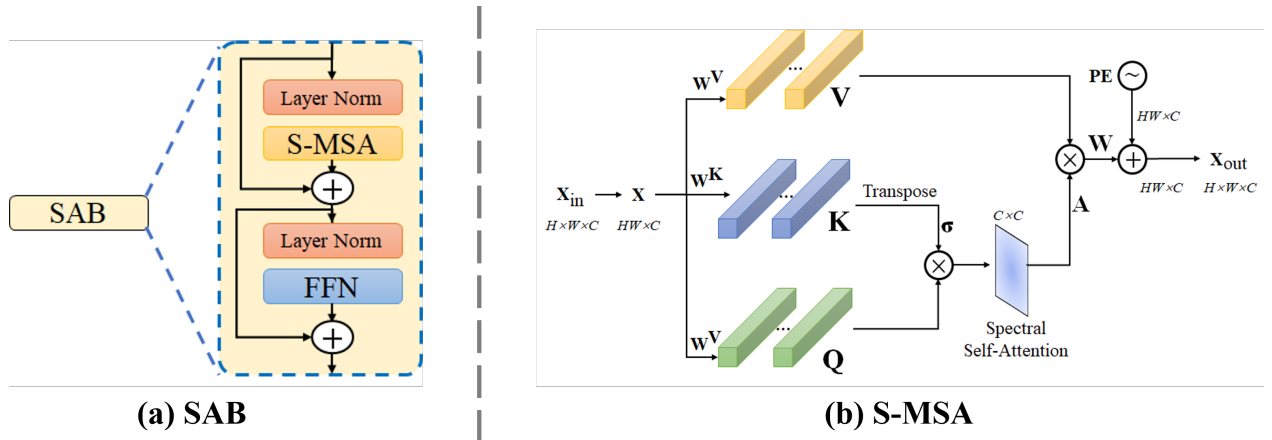

Figure 1: (a) Structure of spectral attention block (SAB), where S-MSA and FFN denote Spectral-wise Multi-head Self-Attention and Feed Forward Network, respectively. (b) The calculation process of Spectral-wise Multi-head Self-Attention.

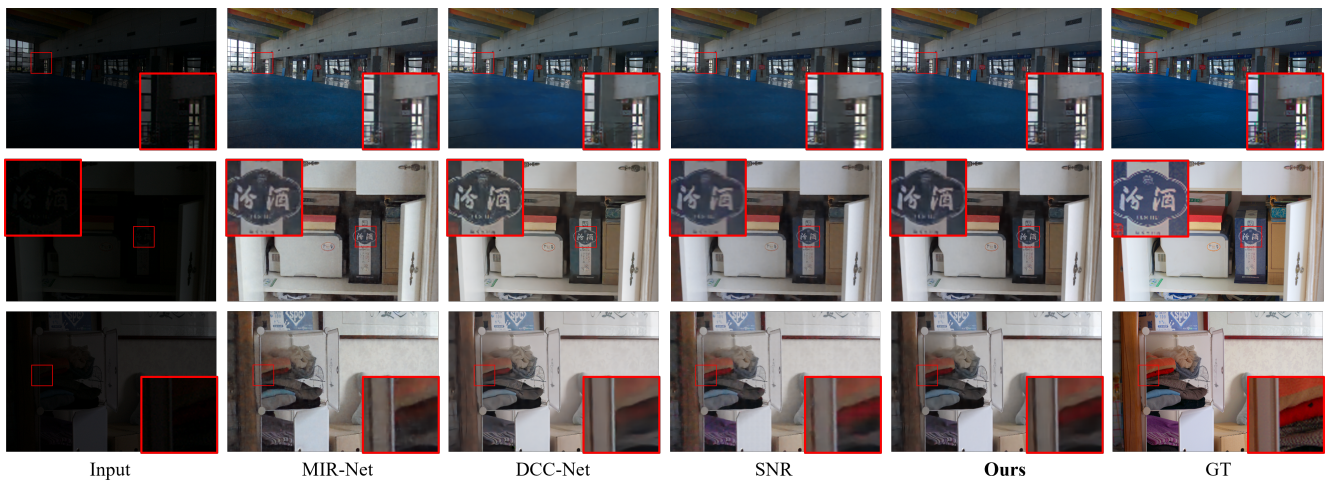

Figure 2: More visual quality comparisons of different low-light image enhancement methods on the LOLv1 dataset.

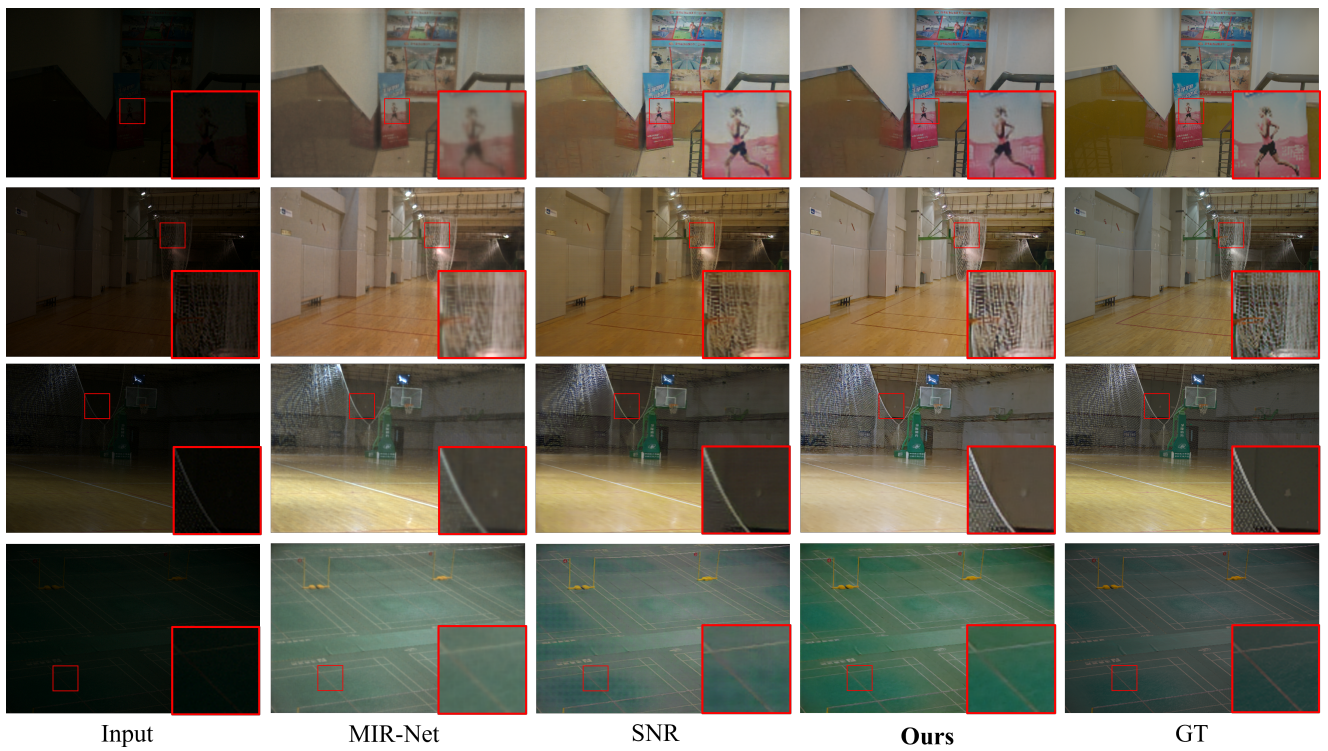

Figure 3: More visual quality comparisons of different low-light image enhancement methods on the LOLv2-Real dataset.

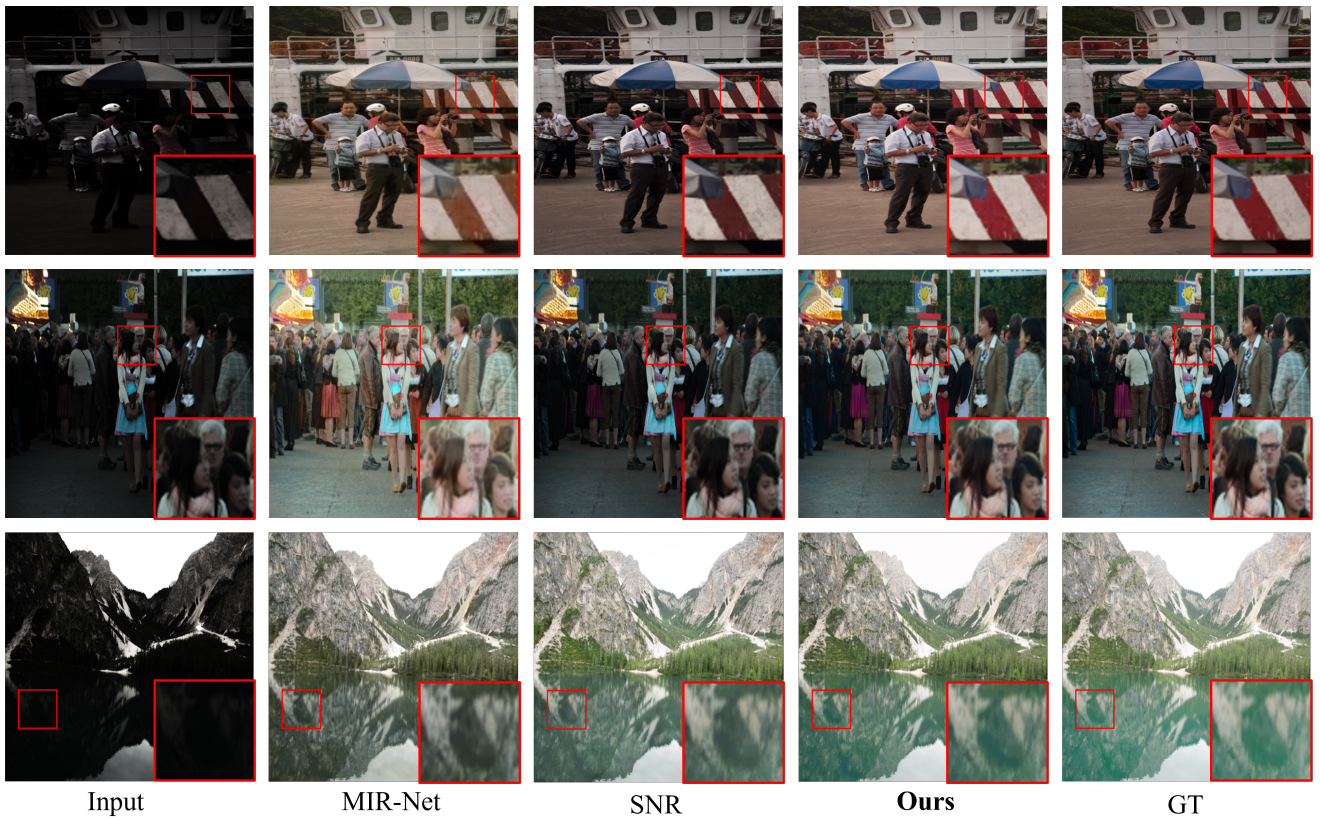

Figure 4: More visual quality comparisons of different low-light image enhancement methods on the LOLv2-Synthetic dataset.

## References

- [1] Yuanhao Cai, Jing Lin, Xiaowan Hu, Haoqian Wang, Xin Yuan, Yulun Zhang, Radu Timofte, and Luc Van Gool. Mask-guided spectral-wise transformer for efficient hyperspectral image reconstruction. In *Proceedings of the IEEE/CVF Conference on Computer Vision and Pattern Recognition*, pages 17502–17511, 2022. [1](#)
- [2] Yuanhao Cai, Jing Lin, Zudi Lin, Haoqian Wang, Yulun Zhang, Hanspeter Pfister, Radu Timofte, and Luc Van Gool. Mst++: Multi-stage spectral-wise transformer for efficient spectral reconstruction. In *Proceedings of the IEEE/CVF Conference on Computer Vision and Pattern Recognition*, pages 745–755, 2022. [1](#)
- [3] Chen Wei, Wenjing Wang, Wenhan Yang, and Jiaying Liu. Deep retinex decomposition for low-light enhancement. *arXiv preprint arXiv:1808.04560*, 2018. [1](#)
- [4] Xiaogang Xu, Ruixing Wang, Chi-Wing Fu, and Jiaya Jia. Snr-aware low-light image enhancement. In *Proceedings of the IEEE/CVF Conference on Computer Vision and Pattern Recognition*, pages 17714–17724, 2022. [1](#)
- [5] Wenhan Yang, Wenjing Wang, Haofeng Huang, Shiqi Wang, and Jiaying Liu. Sparse gradient regularized deep retinex network for robust low-light image enhancement. *IEEE Transactions on Image Processing*, 30:2072–2086, 2021. [1](#)
- [6] Syed Waqas Zamir, Aditya Arora, Salman Khan, Munawar Hayat, Fahad Shahbaz Khan, Ming-Hsuan Yang, and Ling Shao. Learning enriched features for real image restoration and enhancement. In *Computer Vision—ECCV 2020: 16th European Conference, Glasgow, UK, August 23–28, 2020, Proceedings, Part XXV 16*, pages 492–511. Springer, 2020. [1](#)
- [7] Zhao Zhang, Huan Zheng, Richang Hong, Mingliang Xu, Shuicheng Yan, and Meng Wang. Deep color consistent network for low-light image enhancement. In *Proceedings of the IEEE/CVF Conference on Computer Vision and Pattern Recognition*, pages 1899–1908, 2022. [1](#)
